# Supplementary material
Source: Royal Society of Chemistry journal article supplement (doi:10.1039/d6cp00601a)
Supplement: d6cp00601a1.pdf [file d6cp00601a1.pdf]

**Theoretical study on Electrocatalytic Reduction of  
CO<sub>2</sub> over Co based nitrogen doped graphene  
nanolayer supported diatomic catalyst**

**Ke Li, Bingjie Ye, Wei Li\*, Shixi Liu\***

**School of Chemical Science and Engineering, National Demonstration Center for  
Experimental Chemistry and Chemical Engineering Education, Yunnan  
University, Chenggong Campus, Yunnan University, South Section, East Outer  
Ring Road, Chenggong District, Kunming, Yunnan province, People's Republic  
of China.**

**Table. S1.** The single-point energy of  $\text{CoN}_3\text{-CoN}_3\text{@NGr-a}$ ,  $\text{*CO}_2$  ( $\text{CoN}_3\text{-CoN}_3\text{@NGr-a}$ ), and the difference between these two.

|               | CoCoa   | *CO <sub>2</sub> (CoCoa) | Difference |
|---------------|---------|--------------------------|------------|
| DZP/TZP-Small | -628.80 | -651.84                  | -23.04     |
| DZP/TZP-None  | -630.12 | -653.43                  | -23.30     |
| DZP/TZP-Large | -628.28 | -651.47                  | -23.20     |
| DZ-Small      | -603.82 | -624.48                  | -20.67     |
| TZ2P-Small    | -640.14 | -664.29                  | -24.14     |
| QZ4P-Small    | -641.77 | -665.65                  | -23.87     |

**Table. S2.** The formation energy ( $E_f$ ) of NGr, and the adsorption energy of NGr ( $AE_1$ ) with  $\text{CO}_2$ .

|             | NGr-a | NGr-s |
|-------------|-------|-------|
| $E_f$ (eV)  | 5.88  | 8.26  |
| $AE_1$ (eV) | -0.42 | 0.01  |

**Table. S3.** Bader analysis values ( $|e^-|$ ) of Co,  $M^2$  and  $\text{CO}_2$  on  $M^1\text{N}_3\text{-M}^2\text{N}_3\text{@NGr}$  before ( $\text{Co-1}$ ,  $M^2\text{-1}$ ) and after  $\text{CO}_2$  adsorption ( $\text{CO}_2$ ,  $\text{Co-2}$ ,  $M^2\text{-2}$ ). Adsorption energy ( $AE_2$ ) of transition metal atoms loaded on NGr by  $M^1$  and  $M^2$ .

| Catalyst | Co-1 | M <sup>2</sup> -1 | CO <sub>2</sub> | Co-2 | M <sup>2</sup> -2 | AE <sub>2</sub> |
|----------|------|-------------------|-----------------|------|-------------------|-----------------|
| CoCoa    | 0.69 | 0.69              | -0.54           | 0.84 | 0.89              | -13.09          |
| CoCra    | 0.61 | 1.14              | -0.64           | 0.76 | 1.41              | -12.83          |
| CoCua    | 0.70 | 0.67              | -0.68           | 0.78 | 0.76              | -12.36          |
| CoFea    | 0.65 | 0.89              | -0.50           | 0.88 | 0.91              | -13.85          |
| CoMna    | 0.60 | 1.07              | -0.57           | 0.77 | 1.24              | -12.52          |
| CoNia    | 0.73 | 0.58              | -0.38           | 0.90 | 0.63              | -14.05          |
| CoCos    | 0.86 | 0.86              | -0.41           | 0.90 | 0.97              | -11.44          |
| CoCrs    | 0.89 | 1.20              | -0.65           | 0.93 | 1.43              | -10.64          |
| CoCus    | 0.88 | 0.68              | -0.33           | 0.90 | 0.84              | -9.20           |
| CoFes    | 0.88 | 1.04              | -0.50           | 0.90 | 1.17              | -11.54          |
| CoMns    | 0.89 | 1.10              | -0.62           | 0.91 | 1.30              | -10.73          |
| CoNis    | 0.87 | 0.80              | -0.47           | 0.90 | 0.87              | -10.73          |

**Table. S4.** The Gibbs free energy change ( $\Delta G$  (eV)) of CO<sub>2</sub>RR reaction intermediates on the active site of M<sup>1</sup>N<sub>3</sub>-M<sup>2</sup>N<sub>3</sub>@NGr-a (M<sup>1</sup>=Co and M<sup>2</sup>=Co, Cr, Mn, Ni) surface.

|          | CoCoa | CoCra | CoMna | CoNia |
|----------|-------|-------|-------|-------|
| *H       | -0.02 | 0.36  | 0.26  | 0.59  |
| *COOH    | -0.03 | 0.03  | -0.11 | 0.46  |
| *OCHO    | 0.13  | 0.29  | 0.38  | 0.99  |
| *OCHOH   | 0.52  | 0.94  | 0.81  | 0.58  |
| *CO      | -1.43 | -0.51 | -0.31 | -0.73 |
| *CHO     | 2.10  | 0.49  | 0.01  | 0.19  |
| *CO*CO   | -0.37 | -1.09 | -1.17 | 0.02  |
| *CHO*CO  | 0.25  | 0.57  | 0.41  | 0.26  |
| *COH*CO  | 1.31  | 1.02  | 0.97  | 1.28  |
| *OCHCO   | 0.82  | 0.17  | 0.35  | -0.46 |
| *CHOH*CO | 0.84  | 0.36  | 0.86  | 1.06  |

|                                    |       |       |       |       |
|------------------------------------|-------|-------|-------|-------|
| *OCHCOH                            | 0.29  | 0.02  | 0.06  | 0.37  |
| *OCH <sub>2</sub> COH              | 0.33  | -0.17 | -0.14 | 0.68  |
| *OCH <sub>2</sub> CHOH             | -0.78 | -0.29 | -0.43 | -0.59 |
| *OCH <sub>2</sub> CH               | 0.39  | -0.19 | 0.29  | 0.55  |
| *OCH <sub>2</sub> CH <sub>2</sub>  | -1.10 | -0.93 | -0.53 | -0.56 |
| *O+C <sub>2</sub> H <sub>4</sub>   | -0.85 | -0.32 | -1.03 | -1.15 |
| *OCH <sub>2</sub> CH <sub>3</sub>  | -1.45 | -0.65 | -0.23 | -1.93 |
| CH <sub>3</sub> CH <sub>2</sub> OH | 0.30  | 0.83  | -     | -0.41 |
| *OH                                | -     | -     | -0.01 | -     |
| *H <sub>2</sub> O                  | -     | -     | 0.24  | -     |
| H <sub>2</sub> O                   | -     | -     | -0.15 | -     |

**Table. S5.** The Gibbs free energy change ( $\Delta G$  (eV)) of CO<sub>2</sub>RR reaction intermediates on the active site of M<sup>1</sup>N<sub>3</sub>-M<sup>2</sup>N<sub>3</sub>@NGr-a (with M<sup>1</sup>=Co and M<sup>2</sup>=Cu, Fe) surface.

|                                | CoCua |                                | CoFea |
|--------------------------------|-------|--------------------------------|-------|
| *H                             | 1.01  | *H                             | 0.18  |
| *COOH                          | 0.14  | *COOH                          | 0.03  |
| *OOCH                          | 0.20  | *OOCH                          | 0.15  |
| *OCHOH                         | 0.25  | *OCHOH                         | 0.33  |
| *CO                            | -0.55 | *CO                            | -1.12 |
| *CHO                           | 0.22  | *CHO                           | 0.88  |
| *CO*CO                         | 0.01  | *CO*CO                         | -0.82 |
| *CHO*CO                        | 0.27  | *CHO*CO                        | 0.60  |
| *COH*CO                        | 1.89  | *COH*CO                        | -0.85 |
| *OCHCO                         | 0.91  | *COH*CHO                       | 2.22  |
| *CHOH*CO                       | 0.61  | *C*CO                          | -0.71 |
| *CHOHCO                        | -0.85 | *CCO                           | -0.81 |
| *CHOHCOH                       | 0.53  | *CCOH                          | 0.78  |
| *CHCOH                         | -0.24 | *CCHO                          | -0.15 |
| *CH <sub>2</sub> COH           | -1.44 | *CCHOH                         | -0.29 |
| *CH <sub>2</sub> CHOH          | -0.47 | *CCH                           | 0.06  |
| *C <sub>2</sub> H <sub>3</sub> | -0.37 | *CCH <sub>2</sub>              | 0.36  |
| *C <sub>2</sub> H <sub>4</sub> | -0.72 | *C <sub>2</sub> H <sub>3</sub> | -1.73 |
| C <sub>2</sub> H <sub>4</sub>  | 0.50  | C <sub>2</sub> H <sub>4</sub>  | 0.01  |
| *C <sub>2</sub> H <sub>5</sub> | -0.32 | -                              | -     |
| C <sub>2</sub> H <sub>6</sub>  | -1.11 | -                              | -     |

**Table. S6.** The adsorption energy ( $AE_3$ ) of  $OC_2H_4$  on  $M^1N_3-M^2N_3@NGr-a$  ( $M^1=Co$  and  $M^2=Co, Cr, Mn, Ni$ ).

|             | CoCoa | CoCra | CoMna | CoNia |
|-------------|-------|-------|-------|-------|
| $AE_3$ (eV) | -4.32 | -5.81 | -8.12 | -2.74 |

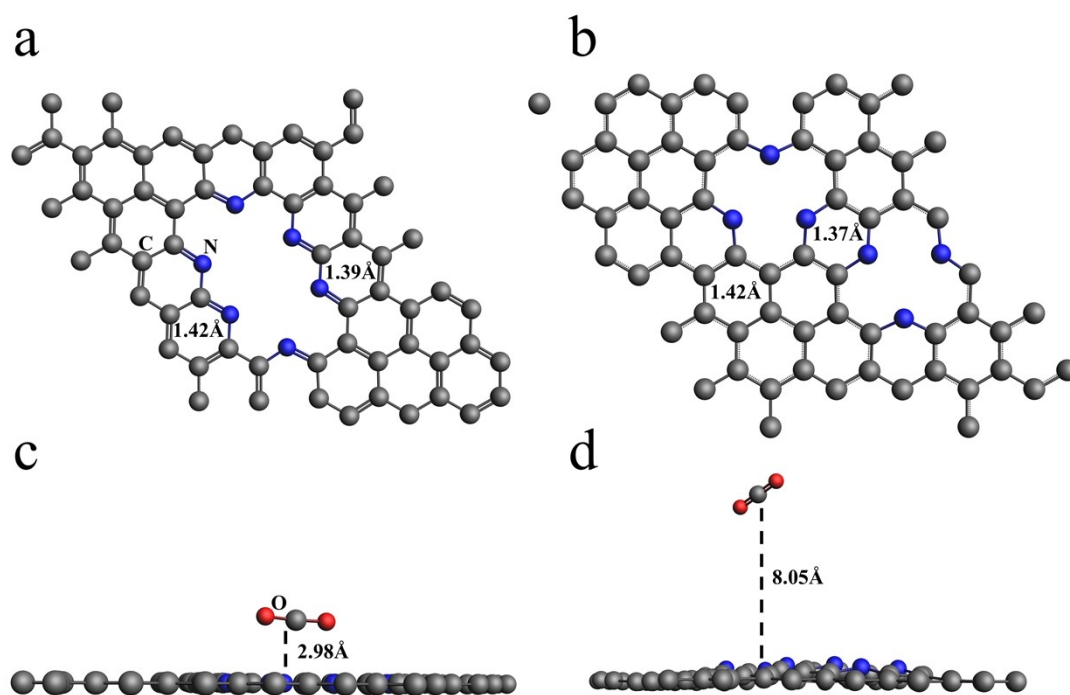

**Fig. S1.** The structural model of NGr-a (a), NGr-s (b), NGr-a adsorbing  $CO_2$  (c), NGr-s adsorbing  $CO_2$  (d).

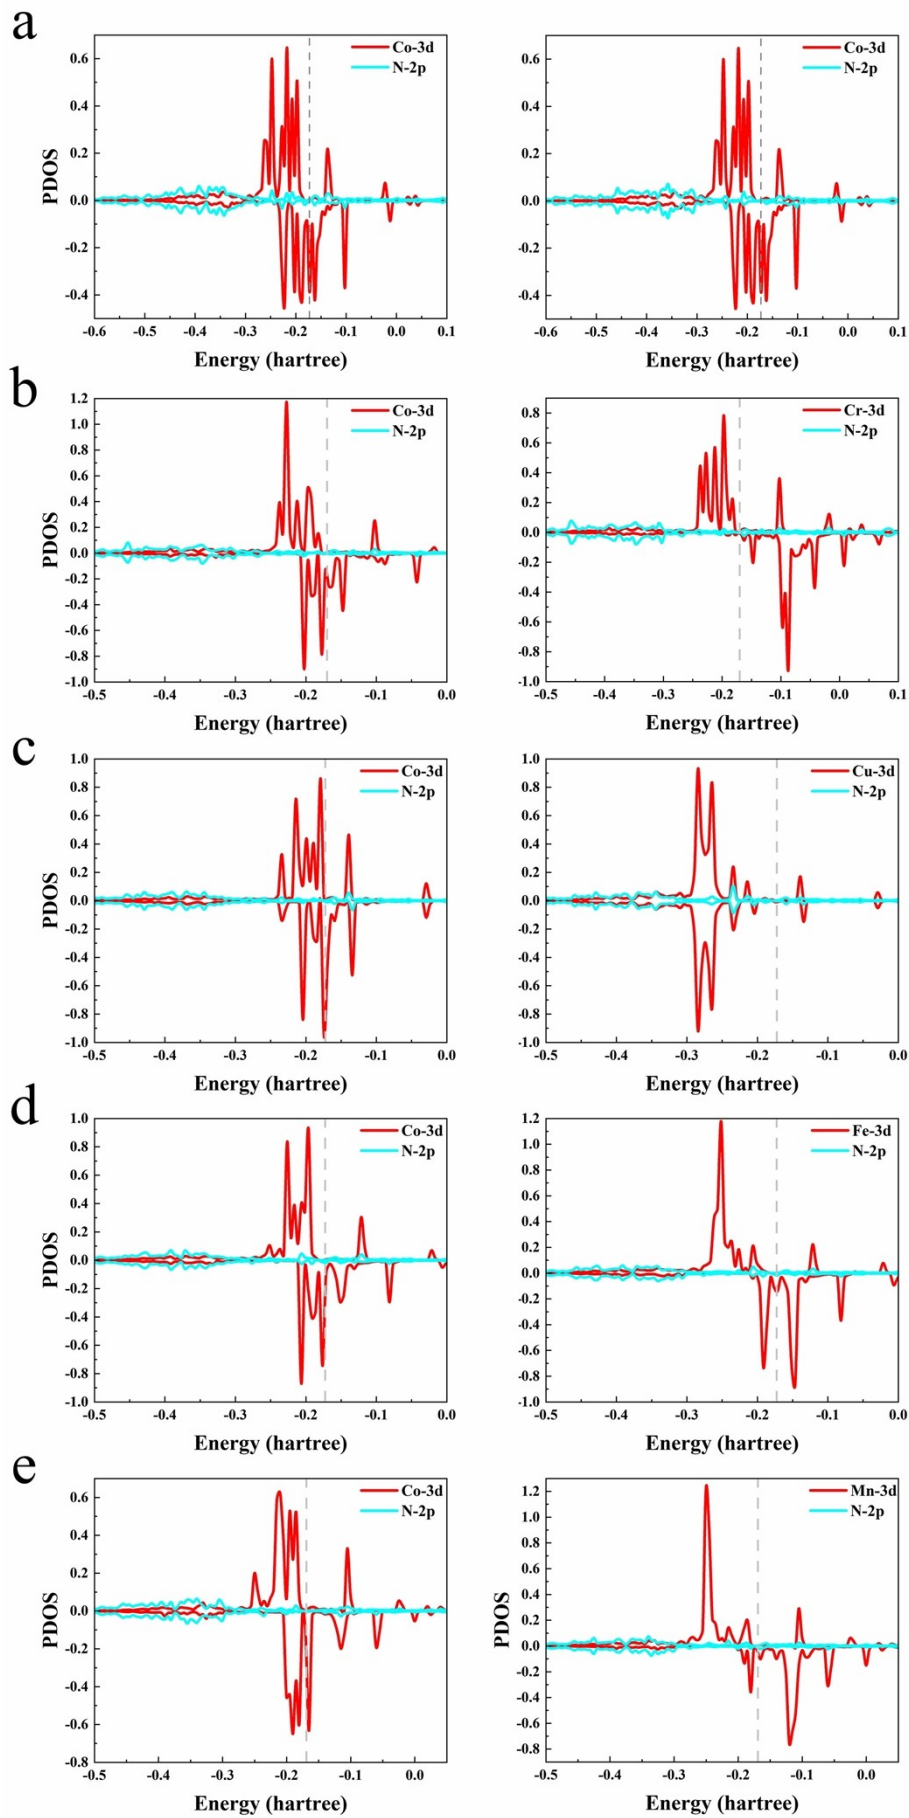

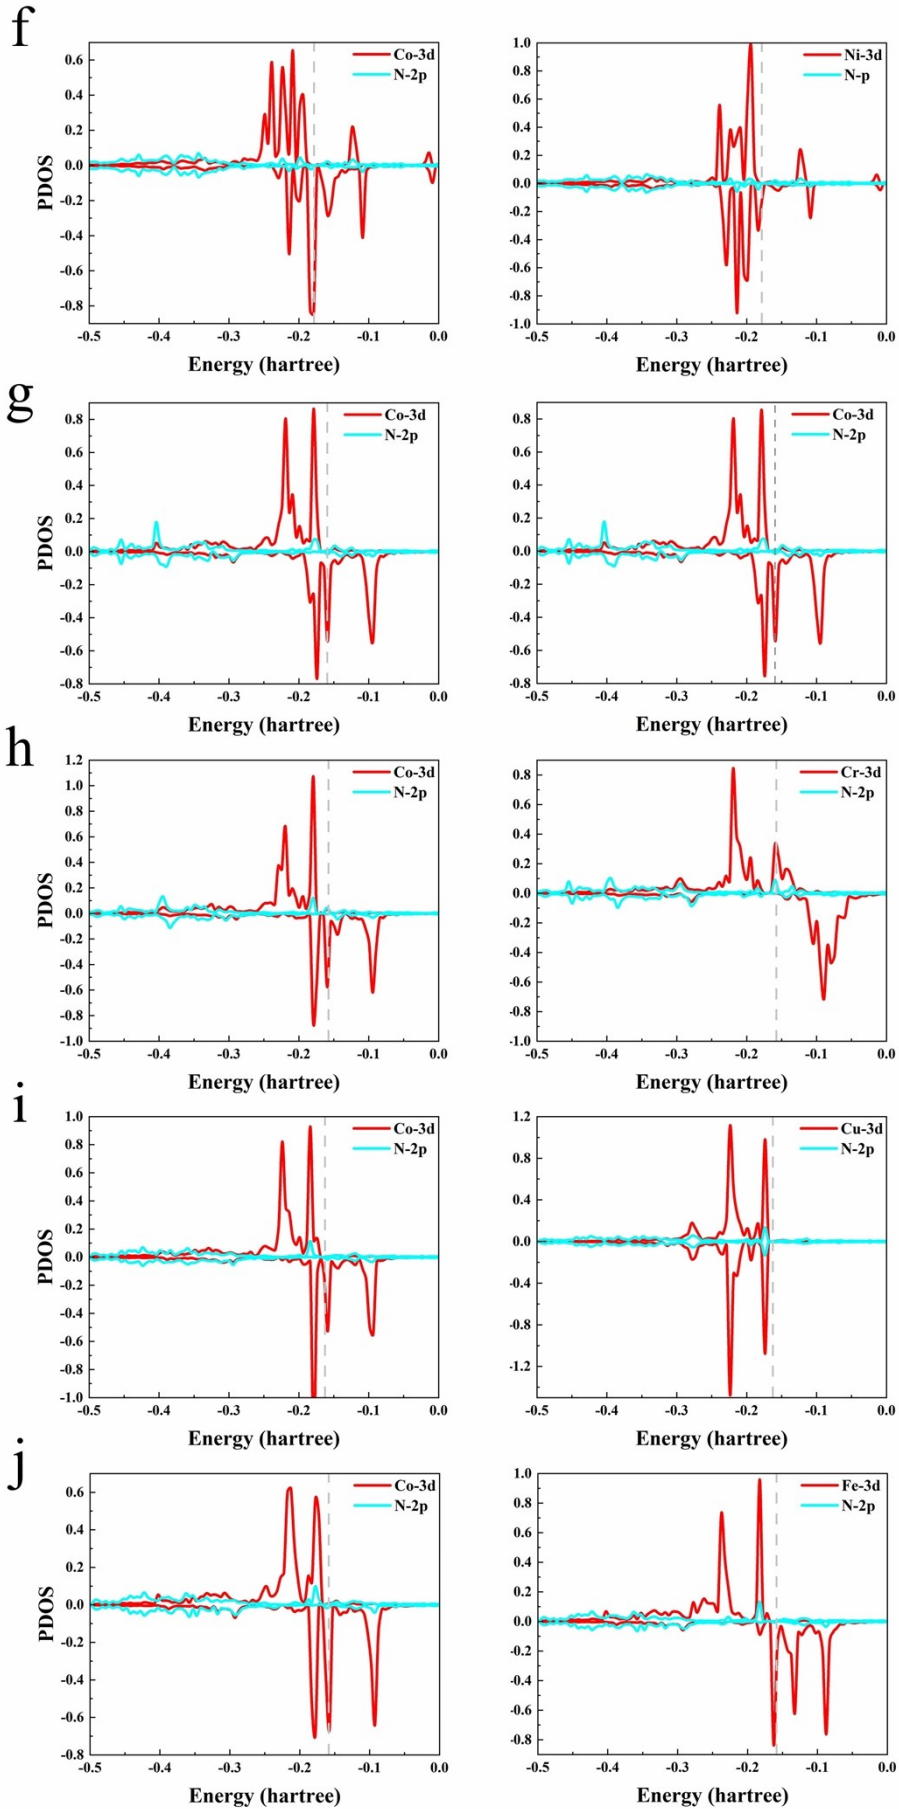

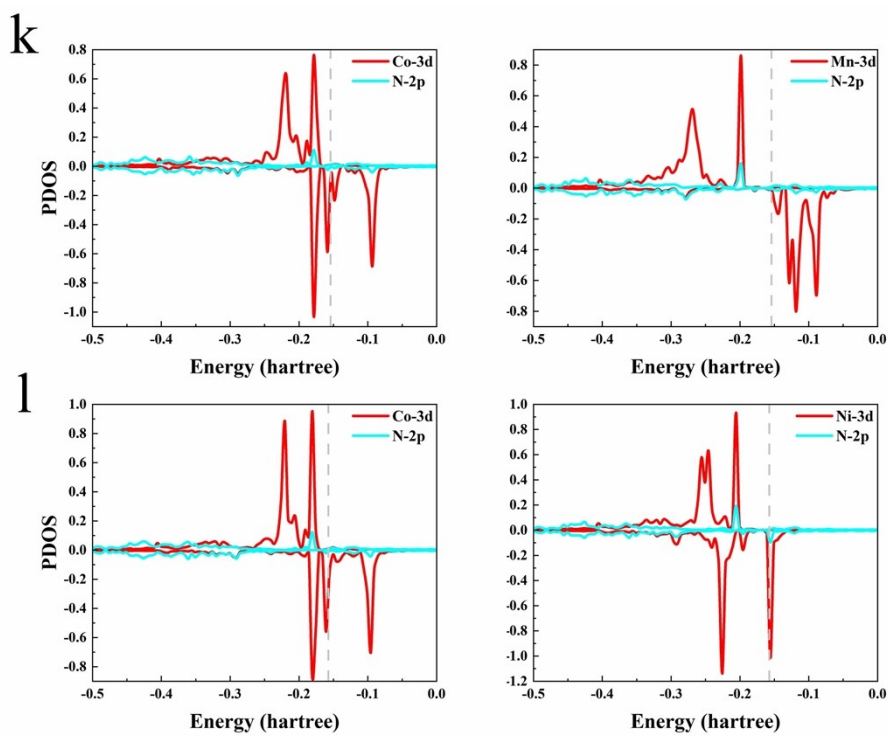

Fig. S2 a-f are the Partial Density of States (PDOS) of metal atoms and nitrogen atoms in  $M^1N_3-M^2N_3@NGr-a$ , and g-l are the PDOS of metal atoms and nitrogen atoms in  $M^1N_3-M^2N_3@NGr-s$  (with  $M^1=Co$  and  $M^2=Co, Cr, Cu, Fe, Mn, Ni$ ).

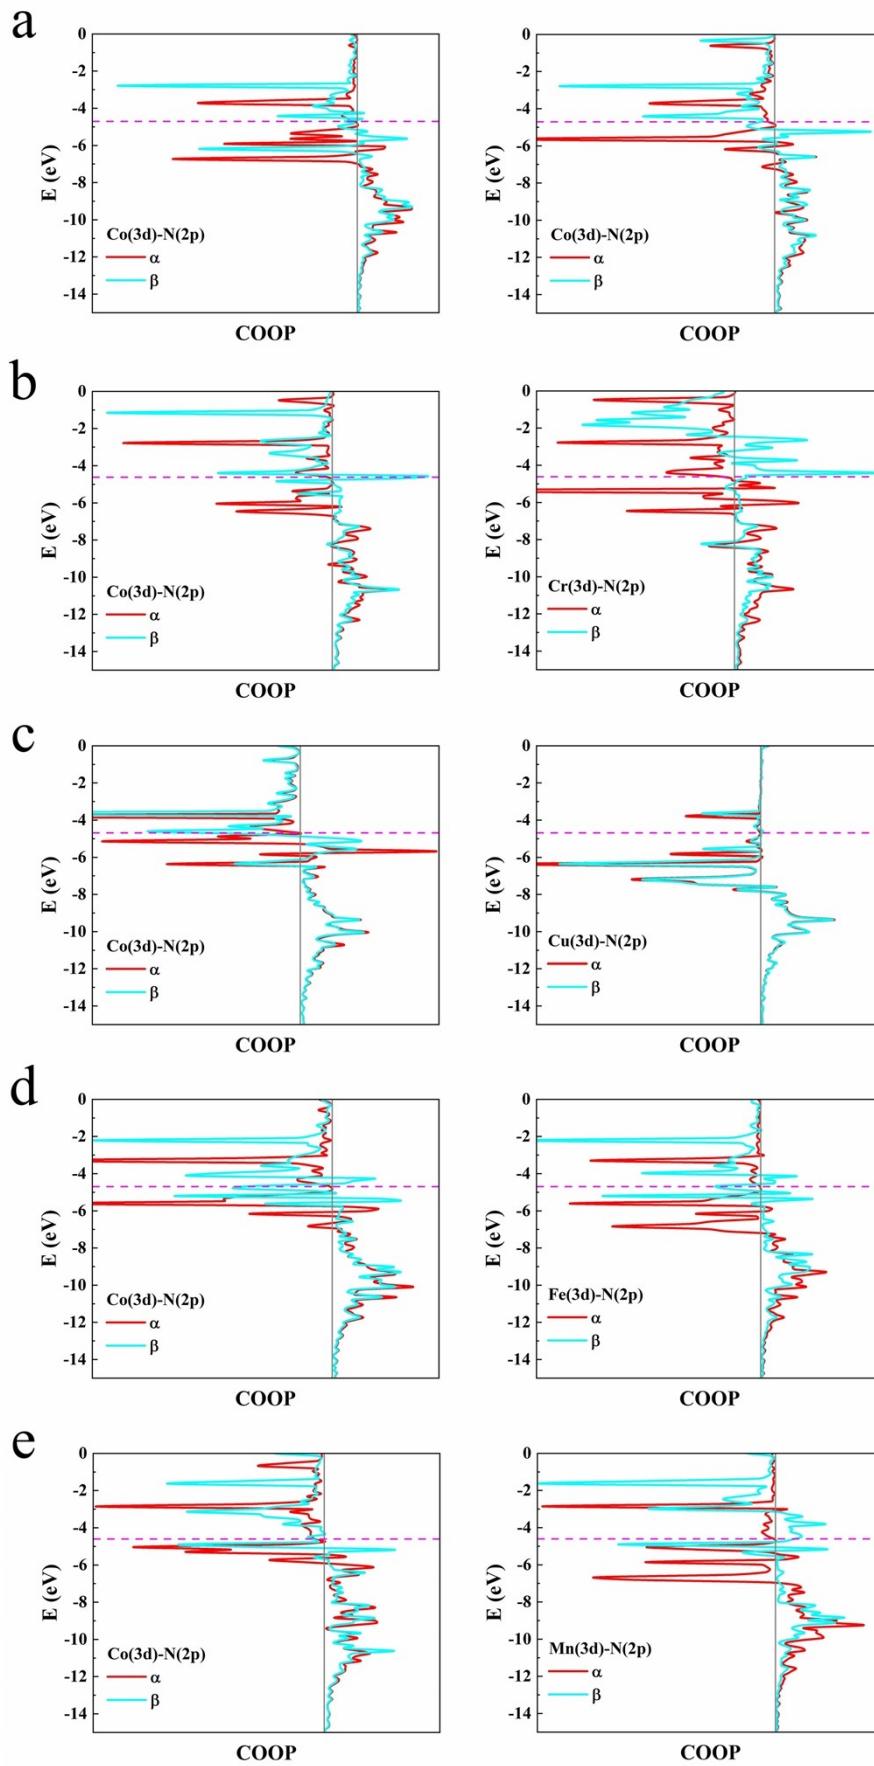

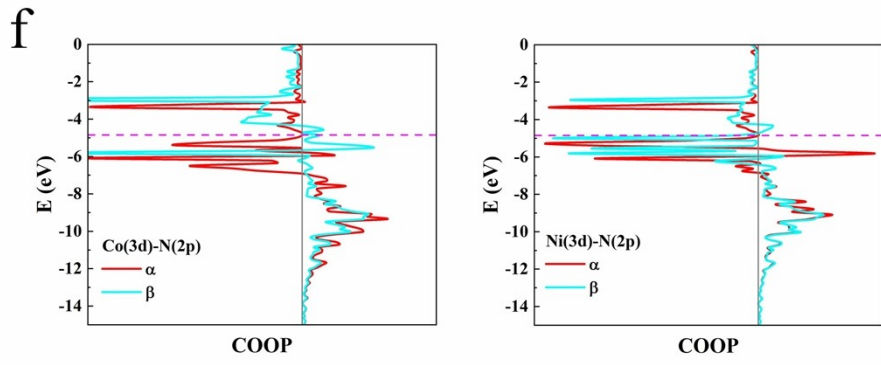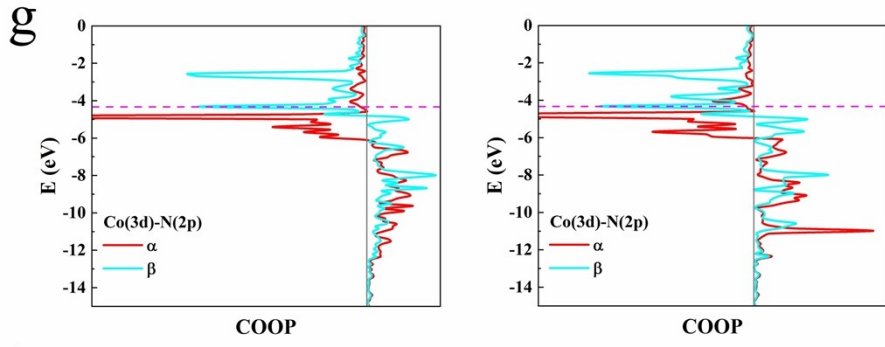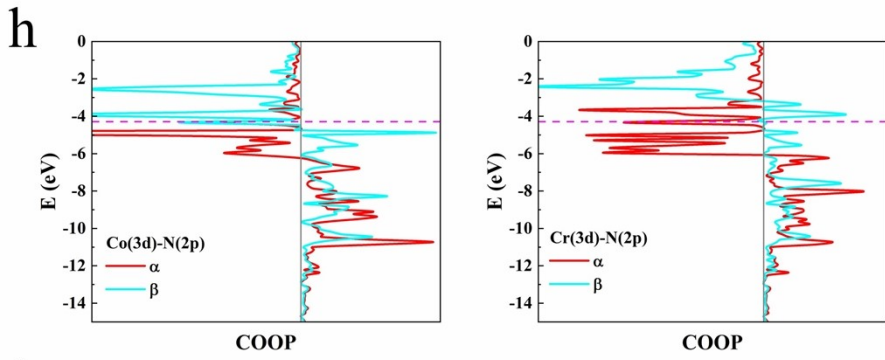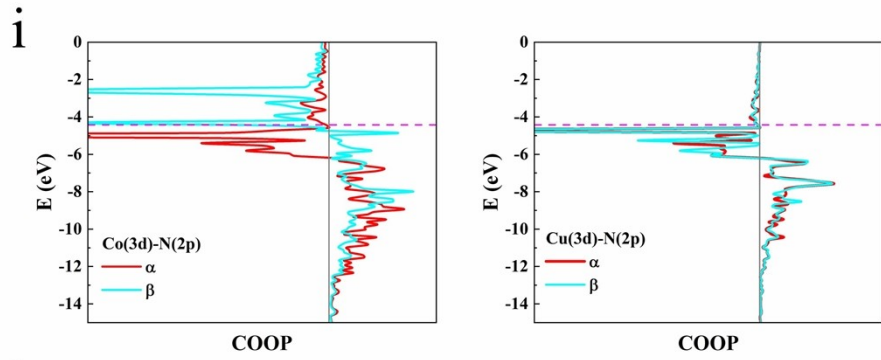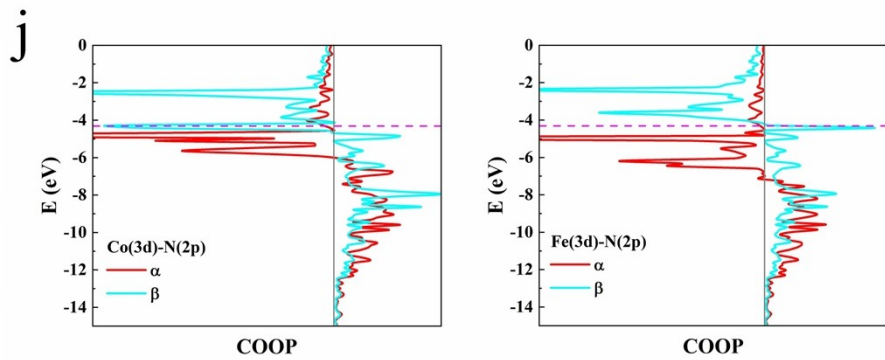

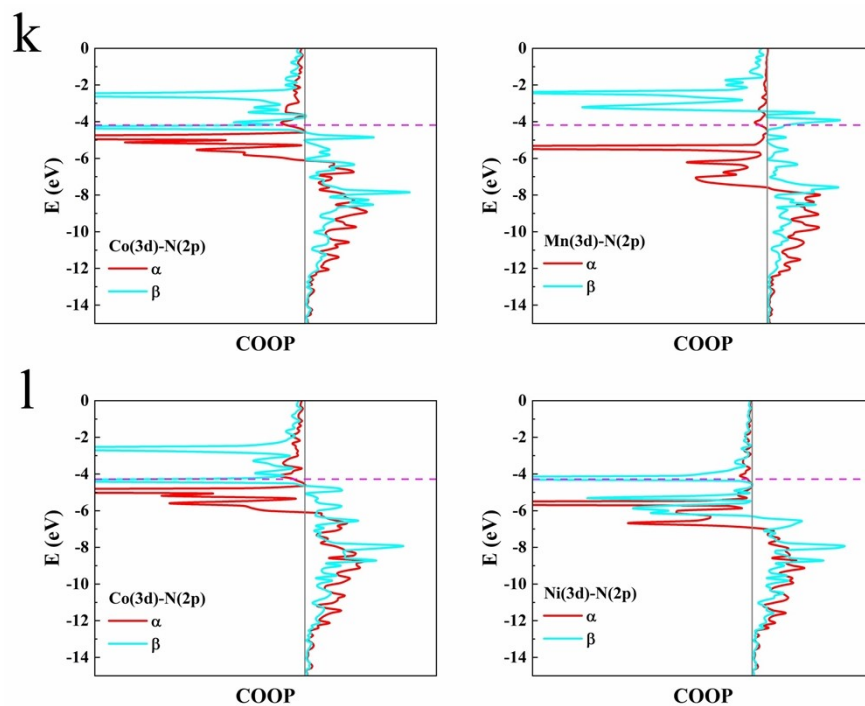

Fig. S3 a-f are the Crystal Orbital Overlap Population (COOP) of metal atoms and nitrogen atoms in  $M^1N_3-M^2N_3@NGr-a$ , and g-l are the COOP of metal atoms and nitrogen atoms in  $M^1N_3-M^2N_3@NGr-s$  (with  $M^1=Co$  and  $M^2=Co, Cr, Cu, Fe, Mn, Ni$ ).

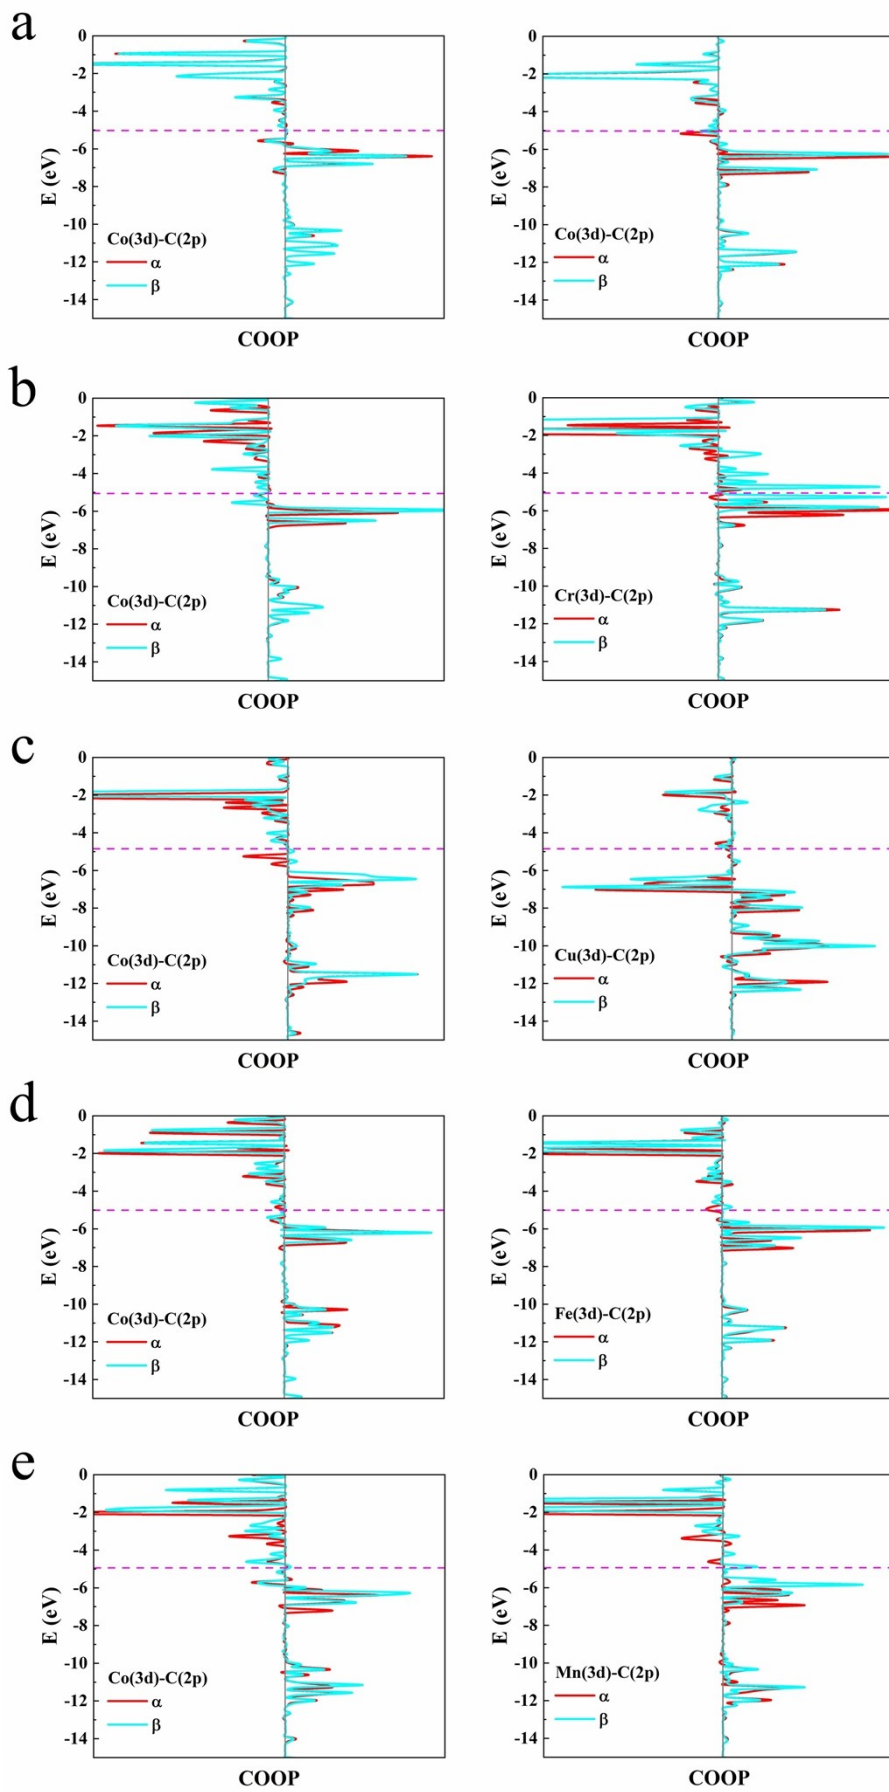

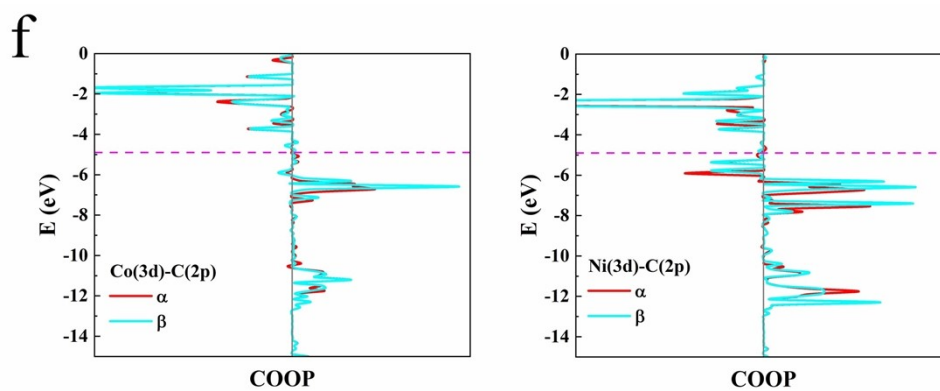

Fig. S4 a-f are the COOP of metal atoms and carbon atoms in the intermediate (\*CO\*CO) of  $M^1N_3$ - $M^2N_3@NGr$ -a (with  $M^1=Co$  and  $M^2=Co, Cr, Cu, Fe, Mn, Ni$ ).

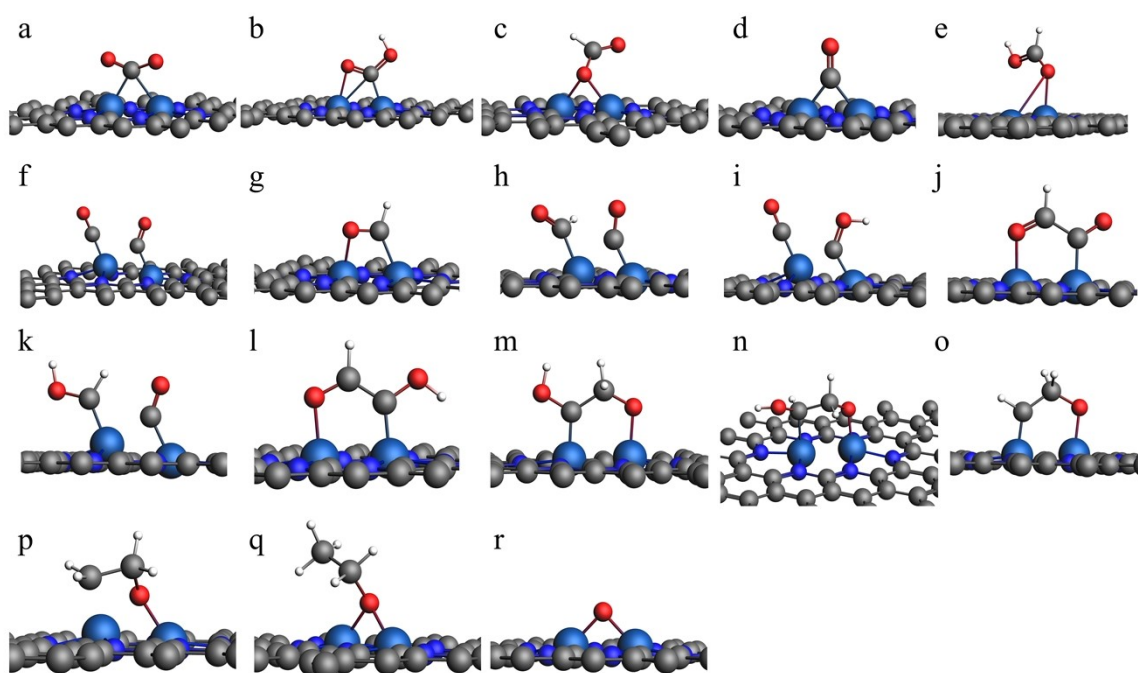

Fig. S5 The structural optimization model for key reaction intermediates of  $CoN_3$ -

$CoN_3@NGr$ -a.

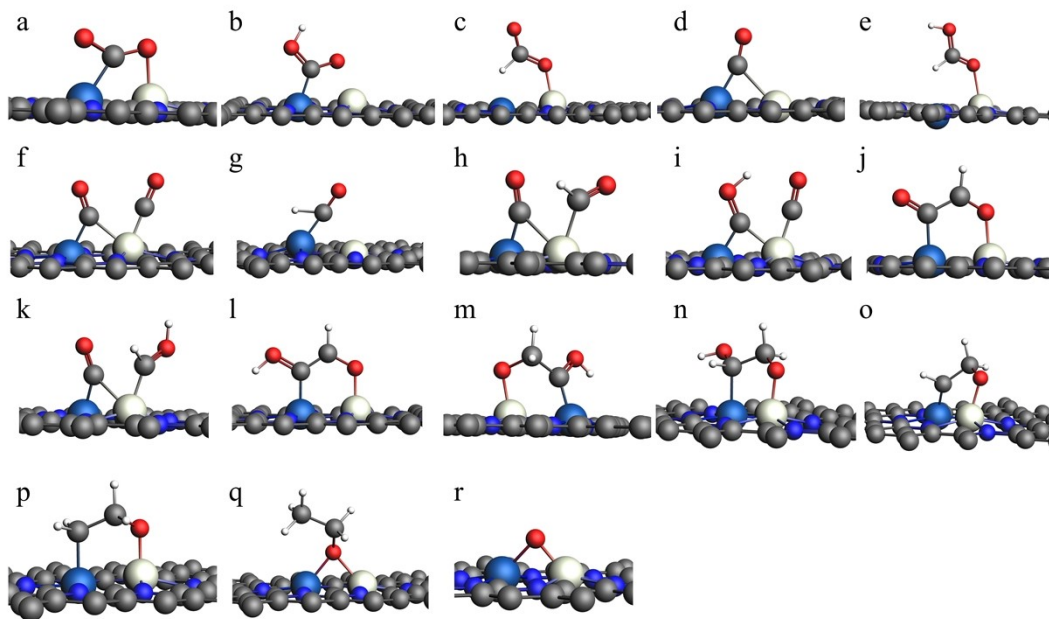

Fig. S6 The structural optimization model for key reaction intermediates of  $\text{CoN}_3\text{-CrN}_3\text{@NGr-a}$ .

$\text{CrN}_3\text{@NGr-a}$ .

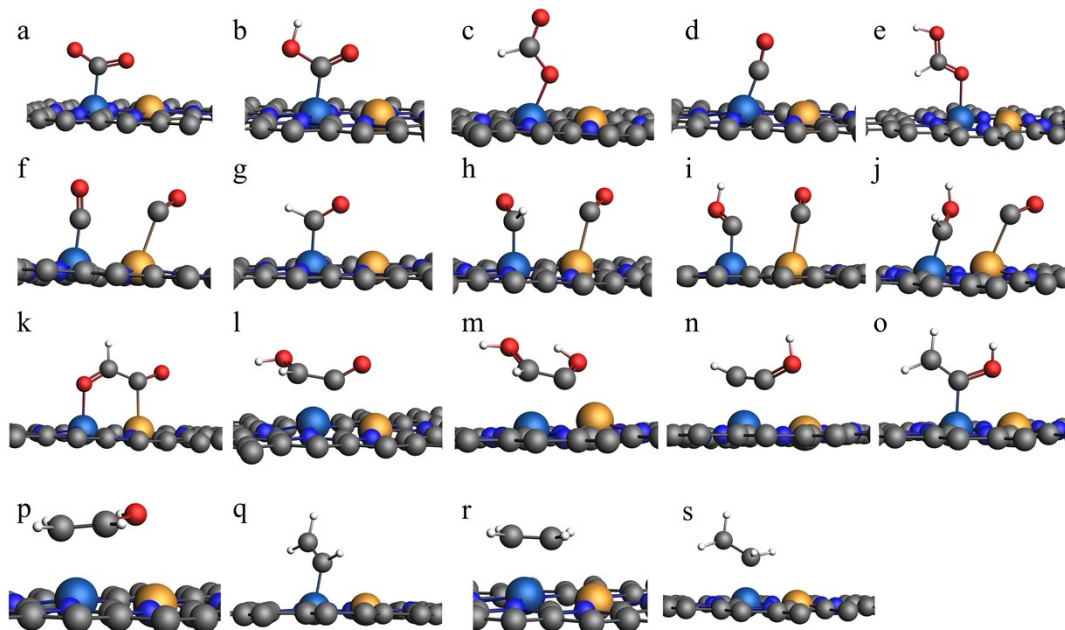

Fig. S7 The structural optimization model for key reaction intermediates of  $\text{CoN}_3\text{-CuN}_3\text{@NGr-a}$ .

$\text{CuN}_3\text{@NGr-a}$ .

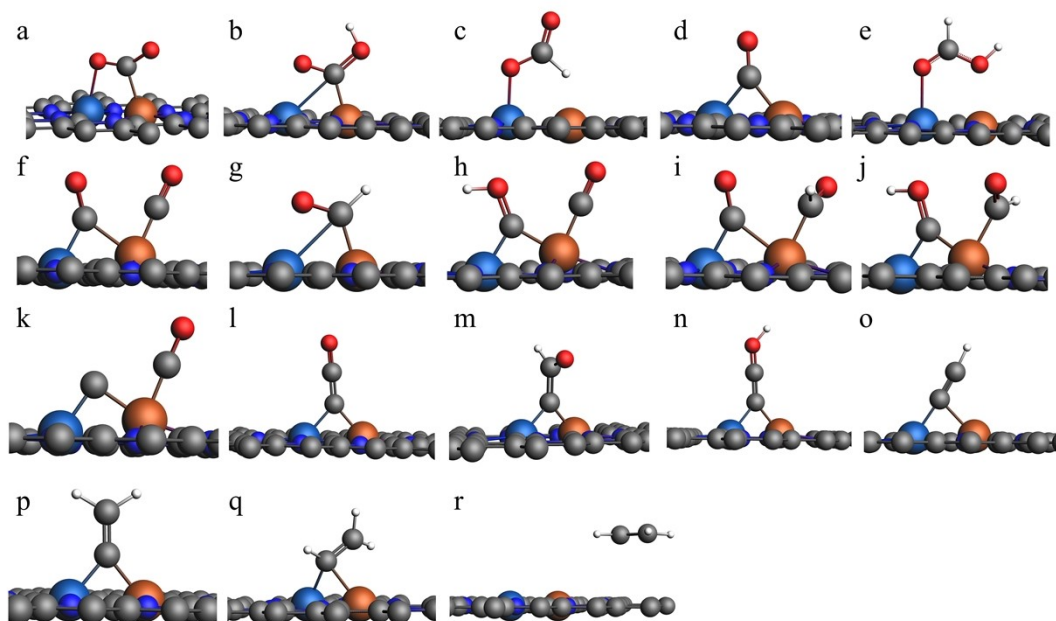

Fig. S8 The structural optimization model for key reaction intermediates of  $\text{CoN}_3\text{-FeN}_3\text{@NGr-a}$ .

$\text{FeN}_3\text{@NGr-a}$ .

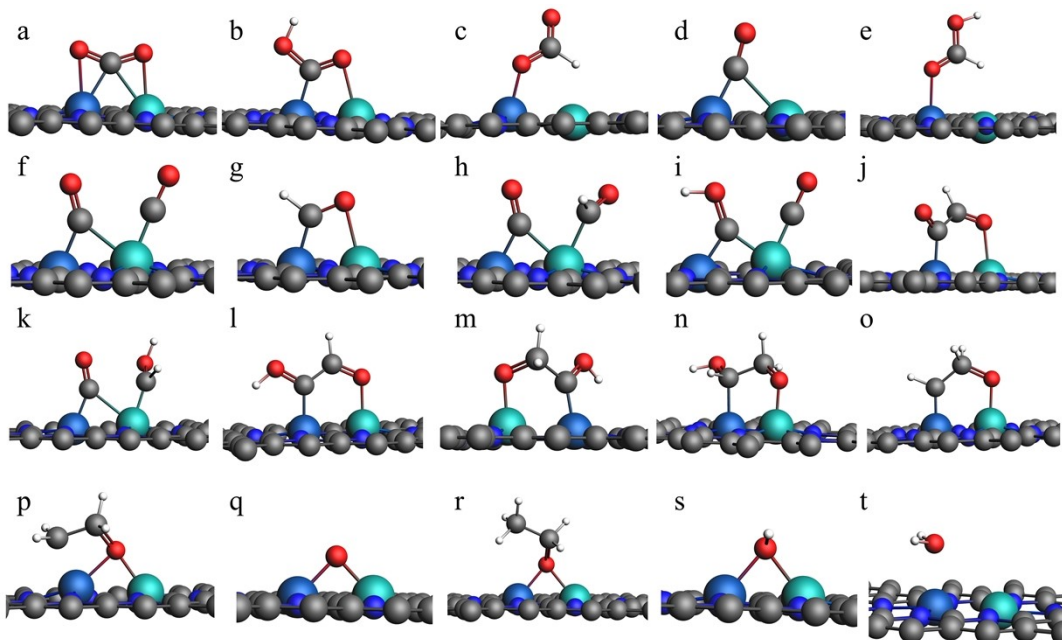

Fig. S9 The structural optimization model for key reaction intermediates of  $\text{CoN}_3\text{-MnN}_3\text{@NGr-a}$ .

$\text{MnN}_3\text{@NGr-a}$ .

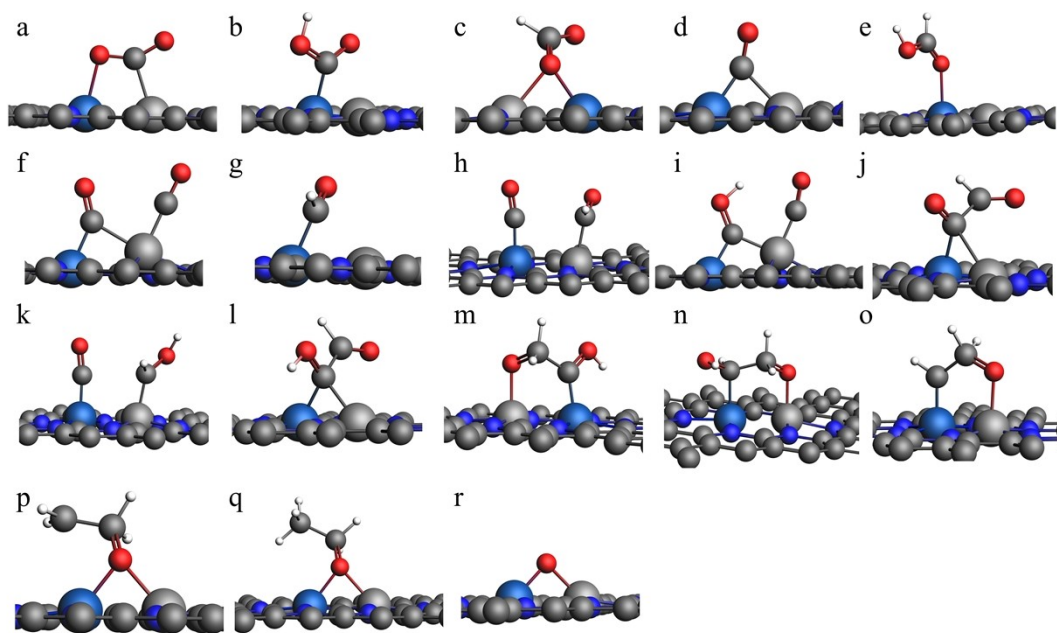

Fig. S10 The structural optimization model for key reaction intermediates of CoN<sub>3</sub>-

NiN<sub>3</sub>@NGr-a.
